# Supplementary material
Source: PubMed Central journal article supplement (PMC3298865)

## SUPPLEMENTARY METHODS

### Behavioural analyses

Starting from the age of 84 days, mice were tested once a week for motor behavioural deficits by the grip test. Animals were posed on a horizontal grip; the grip was then inverted and the time (sec) at which the animal fell from the grip was recorded for a maximum of 90 sec. Animals performed three trials and the time of the best trial was considered for the statistical analysis. Body weight of each animal was recorded before the test. Time of survival was detected as previously described (Peviani, 2007).

For the statistical analyses, the result of each group of animals at each test session was expressed as mean  $\pm$  standard error (S.E.). Missing data, due to death of animals, were taken into account in the statistic analysis as follows: when an animal died, its performance was considered equal to the last recorded value for all subsequent test sessions, until the death of the last animal of the group. The patterns in the progression of motor deficits and body weight were evaluated by a repeated measure two-way ANOVA. The survival of SOD1G93A and GFP1/SOD1G93A mice was analyzed by the log-rank test.

**Table 1**

| Gene                  | Accession n° | TaqMan Gene expression assay |
|-----------------------|--------------|------------------------------|
| $\beta$ -actin (Actb) | NM_007393    | 4352341E                     |
| GFAP                  | NM_010277    | Mm00546086_m1                |
| CD68                  | NM_009853    | Mm00839636_g1                |
| TNF $\alpha$          | NM_013693    | Mm00546086_m1                |

**Table 2**

| Gene Accession                   | n°        | Forward (5' - 3')      | Reverse (5' - 3')       |
|----------------------------------|-----------|------------------------|-------------------------|
| GFP                              | M62654    | CAT GCC CGAAGG CTA CGT | GCT TGT GCC CCA GGA TGT |
| $\beta$ -actin (Actb)            | NM_007393 | GCCCTGAGGCTCTTTTCCAG   | TGCCACAGGATTCCATACCC    |
| $\beta$ 1 subunit of 20S (Psmb1) | NM_011185 | TAATTGGCTGCAGTGGTTTCC  | AAGCGCCGTGAGTACAGGAT    |

|                               |                  |                           |                           |
|-------------------------------|------------------|---------------------------|---------------------------|
| β 2 subunit of 20S (Psmb2)    | NM_011970        | GATGAAGGACGATCATGACAAGAT  | TGGGAGACAATTCATATCCATTCC  |
| β 5 subunit of 20S (Psmb5)    | NM_011186        | CGCAGCAGCCTCCAAACT        | GAAGGCGGTCCCAGAGATC       |
| LMP2 subunit of 20S (Psmb9)   | NM_013585        | TAGCTGACATGGCCGCCTA       | TGGTCCCAGCCAGCTACTATG     |
| LMP7 subunit of 20S (Psmb8)   | NM_010724        | AAGGATGAACAAAGTGATCGAGATT | TGCTGCAGACACGGAGATG       |
| LMP10 subunit of 20S (Psmb10) | NM_013640        | GGAACCCACAGGAGGCTTCT      | GTCCGCTCCCAGGATGACT       |
| α5 subunit of 20S (Psm5)      | NM_011967        | AGTCCTCGCTCATCATCCTCA     | ACGGCTCCTTCTTAAATGTCCTT   |
| S1 subunit of 19S (Psm1)      | NM_027357        | TGTTGGATAATCCAGCACGAGT    | GGTCCACGAGTTCTTCAACGT     |
| α Subunit of 11S (Psm1)       | NM_011189        | GGCTCCACACGCAGATCTC       | TCTCCATGACCATCAGACGG      |
| POMP                          | NM_025624        | GTGTGCTCAGCATAGTTGCCTG    | AGCTTTGCTATAACCTCAGAACCAC |
| CD8 a chain (Cd8a)            | NM_001081<br>110 | CTATTCAAACCACTGCCGCAG     | CCGAGGTTTCGACCTGACATTAC   |

## LEGENDS TO SUPPLEMENTARY FIGURES

**Fig. S1** Representative microphotographs of GFP immunostaining in the ventral (a, c, e) and dorsal horns (b, d, f) of the lumbar spinal cord of NTg (a, b), GFP1 (c, d) and GFP2 (e, f) mice. Scale bar 100 μm. A low background staining appears in NTg and GFP2 sections, while higher immunoreactivity occurs in GFP1 mice.

**Fig. S2** Behavioural analysis of body weight (A) and grip test (B) of SOD1G93A (n=13) compared to GFP1/SOD1G93A mice (n=13) shows no changes in the progression of disease. Each point represents the mean ± S.E. Statistical analysis was done by two-way ANOVA for repeated measures. Panel C compares the survival curves for SOD1G93A and GFP1/SOD1G93A animals. Log-rank analysis of probabilities showed no significant difference.

## SUPPLEMENTARY FIGURES

Fig S1

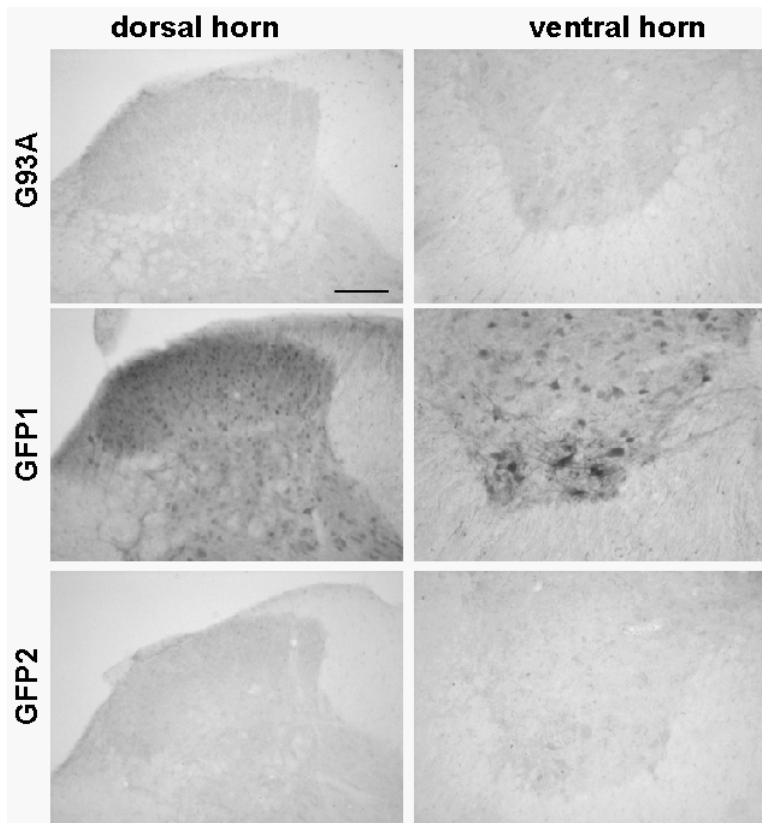

Fig S2

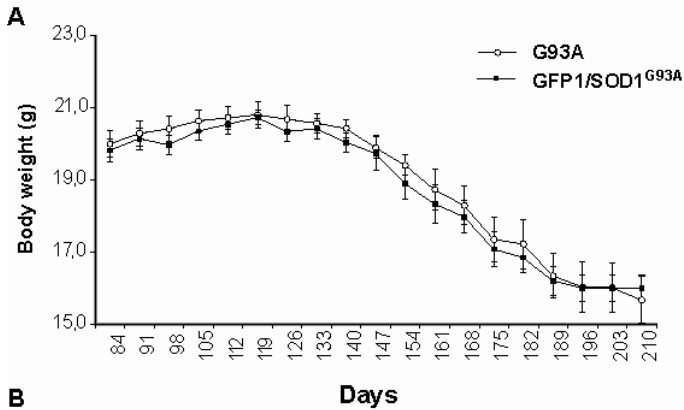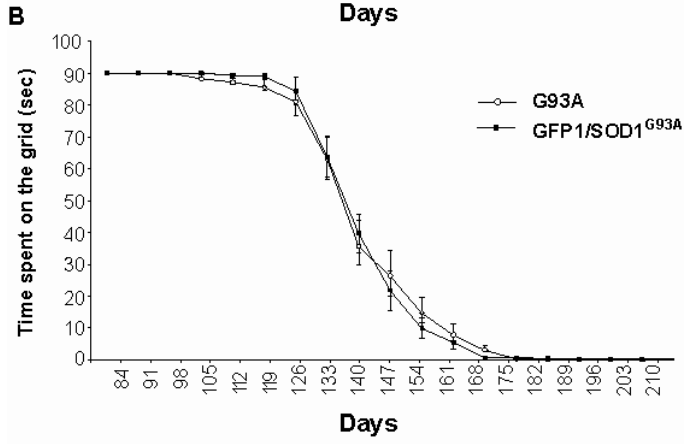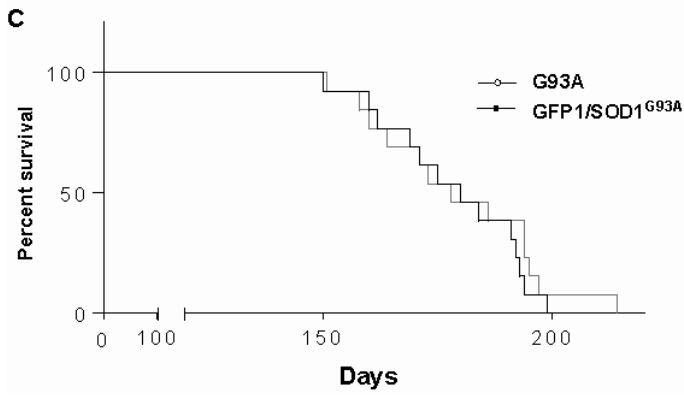

Supplement: ddn319_1.pdf [file ddn319_1.pdf]
